# Supplementary material for: The pioneer transcription factors Foxa1 and Foxa2 regulate alternative RNA splicing during thymocyte positive selection
Source: PubMed Central journal article supplement (PMC8353164; doi:10.1242/dev.199754), 2021-07-29
Supplement: develop-148-199754-s1.pdf [file develop-148-199754-s1.pdf]

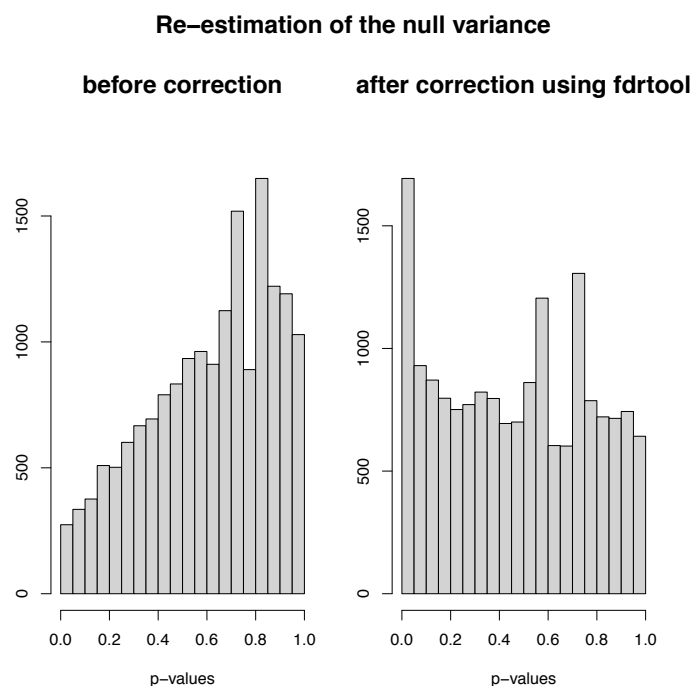

**Fig. S1.** P-value histogram showing before and after correction of overestimation of variance. Left, histogram of P-values obtained using DeSeq2 showing a hill-shape, indicating an overestimation of the variance in the null distribution. Right, histogram of P-values after z-scores returned by DESeq2 were used as input to fdrtool to re-estimate the null variance.

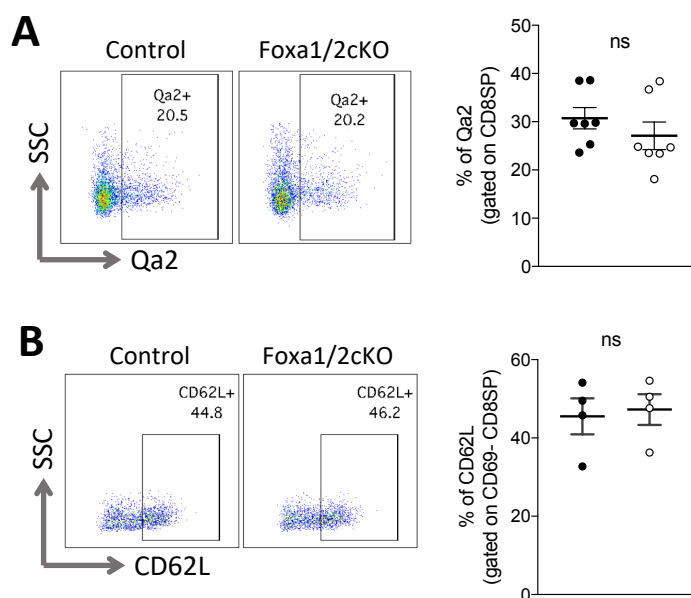

**Fig. S2. (A)** Flow cytometry profiles show anti-Qa2 staining, gated on CD8SP, giving the percentage of cells in the region shown. Scatter plot shows percentage of Qa2<sup>+</sup> cells in the CD8SP population. **(B)** Flow cytometry profiles show anti-CD62L staining, gated on the CD69<sup>-</sup> CD8SP population. Scatter plot shows the percentage of CD62L<sup>+</sup> cells in the CD69<sup>-</sup> CD8SP population.

**Table S1. RNA-Seq datasets from CD4+CD8+CD69+ thymocytes between control and Foxa1/2cKO.**

List of DEG (adjusted p-value < 0.05).

Gene names highlighted in blue indicate genes found in Foxa2 targets in (34).

Gene names highlighted in pink indicate genes found in Foxa1 targets in (44).

Gene names highlighted in purple indicate genes found in both Foxa1 and Foxa2 targets in (34, 44).

Gene names in green indicate genes transcriptionally regulated during positive selection (45).

[Click here to download Table S1](#)

**Table S2. Biological Processes(BP) GO term enrichment analysis of DEG GO analysis of biological processes associated with 176 DEG.**

[Click here to download Table S2](#)

**Table S3. Differential exon usage analysis by DEXSeq from CD4+CD8+CD69+ thymocytes between control and Foxa1/2cKO.**

List of the DEU (adjusted p-value < 0.05).

\*CD4-Cre transgene contains first 2 exons of CD4 (Exon9 and 10 on reverse strand)(94)

Gene names highlighted in blue indicate genes found in Foxa2 targets in (34).

Gene names highlighted in pink indicate genes found in Foxa1 targets in (44).

Gene names highlighted in purple indicate genes found in both Foxa1 and Foxa2 targets in (34, 44).

[Click here to download Table S3](#)

**Table S4. Biological Processes(BP) GO term enrichment analysis of DEU**

GO analysis of biological processes associated with genes containing DEU.

padj = p-value after Benjamini-Hochberg false discovery correction

[Click here to download Table S4](#)

**Table S5.** List of antibodies used in the study

| Antibody | Fluorochrome         | Catalogue number | Company     |
|----------|----------------------|------------------|-------------|
| CD3      | Brilliant Violet 421 | 100227           | Biolegend   |
| CD3      | Alexa Fluor® 700     | 100215           | Biolegend   |
| CD4      | APC/Cyanine7         | 100413           | Biolegend   |
| CD4      | PerCP/Cyanine5.5     | 100433           | Biolegend   |
| CD5      | PerCP/Cyanine5.5     | 100623           | Biolegend   |
| CD8      | Brilliant Violet 421 | 100737           | Biolegend   |
| CD8      | PE                   | 100707           | Biolegend   |
| CD24     | Brilliant Violet 605 | 101827           | Biolegend   |
| CD44     | Brilliant Violet 421 | 103039           | Biolegend   |
| CD62L    | APC                  | 104411           | Biolegend   |
| CD69     | APC/Cyanine7         | 104525           | Biolegend   |
| Foxp3    | Alexa Fluor® 647     | 126407           | Biolegend   |
| NK1.1    | PE/Cyanine7          | 156513           | Biolegend   |
| Qa2      | FITC                 | 121709           | Biolegend   |
| Nr4a1    | PE                   | 12-5965-82       | eBioscience |
| TCRb     | PE/Cyanine7          | 109221           | Biolegend   |
